# Supplementary material for: Differential Apoptosis Radiosensitivity of Neural Progenitors in Adult Mouse Hippocampus
Source: PubMed Central journal article supplement (PMC4926502; doi:10.3390/ijms17060970), 2016-06-20
Supplement: ijms-17-00970-s001.pdf [file ijms-17-00970-s001.pdf]

# Supplementary Materials: Differential Apoptosis Radiosensitivity of Neural Progenitors in Adult Mouse Hippocampus

Yu-Qing Li, Zoey Cheng and Shun Wong

**Table S1.** List of primary antibodies used.

| Antibodies | Dilution | Company                   |
|------------|----------|---------------------------|
| BrdU       | 1:200    | Abcam                     |
| Caspase-3  | 1:1000   | Cell Signaling Technology |
| Calbindin  | 1:1000   | Millipore                 |
| Calretinin | 1:200    | Abcam                     |
| DCX        | 1:2000   | Abcam                     |
| GFAP       | 1:200    | DakoCytomation            |
| Mash1      | 1:50     | Abcam                     |
| Nestin     | 1:200    | Millipore                 |
| NeuN       | 1:500    | Millipore                 |
| p21        | 1:50     | Abcam                     |
| p53        | 1:500    | Novocastra                |
| PARP1      | 1:200    | Jackson ImmunoResearch    |
| SOX2       | 1:150    | Abcam                     |

Abbreviations: BrdU, bromodeoxyuridine; DCX, doublecortin; GFAP, glial fibrillary acidic protein; NeuN, neuronal nuclei; PARP1, poly (ADP-ribose) polymerase 1; SOX2, sex determining region Y-box 2.
